# Supplementary material for: Dynamic features and effects of rainfall on landslides in the Three Gorges Reservoir region, China: using the Xintan landslide and the large Huangya landslide as the examples
Source: Springer Nature journal article supplement (doi:10.1007/s12665-009-0114-5), 2009-03-10
Supplement: MOESM1 [file 11832818]

**Fig.1 Average annual precipitation in the Three Gorges**

**Reservoir Region, China**

Cumulative precipitation (mm)

**Fig.2 Relationship of landslide frequency with the cumulative precipitation**

**Fig.3 Section of the Xintan landslide**

(a) Stands for vertical displacement (b) Stands for horizontal displacement

**Fig 4 The displacement-time curve of Dahuangya rock body**
